# Supplementary material for: Assessment of Annual Cost of Substance Use Disorder in US Hospitals
Source: PubMed Central journal article supplement (PMC7936257; doi:10.1001/jamanetworkopen.2021.0242), 2021-03-05
Supplement: jamanetwopen-e210242-s001.pdf [file jamanetwopen-e210242-s001.pdf]

## Supplemental Online Content

Peterson C, Li M, Xu L, Mikosz CA, Luo F. Assessment of annual cost of substance use disorder in US hospitals. *JAMA Netw Open*. 2021;4(3):e210242.  
doi:10.1001/jamanetworkopen.2021.0242

**eTable.** Descriptive Data

This supplemental material has been provided by the authors to give readers additional information about their work.

**eTable. Descriptive Data**

| Characteristic                  | Emergency department visits |                             |                         |                             | Inpatient admissions    |                             |                         |                             |
|---------------------------------|-----------------------------|-----------------------------|-------------------------|-----------------------------|-------------------------|-----------------------------|-------------------------|-----------------------------|
|                                 | Principal SUD diagnosis     |                             | Secondary SUD diagnosis |                             | Principal SUD diagnosis |                             | Secondary SUD diagnosis |                             |
|                                 | Encounters (%)              | Rate per 100,000 population | Encounters (%)          | Rate per 100,000 population | Encounters (%)          | Rate per 100,000 population | Encounters (%)          | Rate per 100,000 population |
| Total                           | 100.0                       | 668                         | 100.0                   | 1,004                       | 100.0                   | 203                         | 100.0                   | 968                         |
| <b>Age</b>                      |                             |                             |                         |                             |                         |                             |                         |                             |
| 0-17                            | 3.1                         | 92                          | 2.5                     | 110                         | .7                      | 6                           | 1.3                     | 54                          |
| 18-44                           | 57.0                        | 1,062                       | 57.0                    | 1,596                       | 44.8                    | 254                         | 39.0                    | 1,053                       |
| 45-64                           | 35.1                        | 905                         | 34.1                    | 1,324                       | 45.2                    | 354                         | 42.7                    | 1,598                       |
| 65-74                           | 3.8                         | 275                         | 4.7                     | 519                         | 7.2                     | 160                         | 11.3                    | 1,200                       |
| 75+                             | 1.0                         | 100                         | 1.7                     | 262                         | 2.1                     | 66                          | 5.7                     | 844                         |
| <b>Sex</b>                      |                             |                             |                         |                             |                         |                             |                         |                             |
| Male                            | 67.5                        | 915                         | 62.3                    | 1,271                       | 65.9                    | 272                         | 60.7                    | 1,194                       |
| Female                          | 32.5                        | 427                         | 37.7                    | 745                         | 34.1                    | 136                         | 39.3                    | 749                         |
| <b>Race/ethnicity</b>           |                             |                             |                         |                             |                         |                             |                         |                             |
| White, non-Hispanic             | NA                          | NA                          | NA                      | NA                          | 66.6                    | 219                         | 62.5                    | 978                         |
| Black, non-Hispanic             | NA                          | NA                          | NA                      | NA                          | 14.1                    | 218                         | 19.2                    | 1,417                       |
| AI/AN, non-Hispanic             | NA                          | NA                          | NA                      | NA                          | 1.2                     | 299                         | 1.1                     | 1,288                       |
| Asian/PI, non-Hispanic          | NA                          | NA                          | NA                      | NA                          | .9                      | 29                          | 1.1                     | 167                         |
| Hispanic                        | NA                          | NA                          | NA                      | NA                          | 10.7                    | 121                         | 10.4                    | 555                         |
| Other                           | NA                          | NA                          | NA                      | NA                          | 3.2                     | NA                          | 2.6                     | NA                          |
| Unknown                         | NA                          | NA                          | NA                      | NA                          | 3.3                     | NA                          | 3.2                     | NA                          |
| <b>Non-SUD comorbidities, n</b> |                             |                             |                         |                             |                         |                             |                         |                             |
| 0                               | 61.7                        | 412                         | 49.7                    | 499                         | 15.1                    | 31                          | 16.3                    | 158                         |
| 1                               | 24.1                        | 161                         | 26.9                    | 270                         | 22.2                    | 45                          | 19.6                    | 189                         |
| 2                               | 9.3                         | 62                          | 13.0                    | 130                         | 21.5                    | 44                          | 19.2                    | 186                         |
| 3                               | 3.4                         | 22                          | 6.1                     | 61                          | 17.1                    | 35                          | 16.3                    | 158                         |
| 4+                              | 1.6                         | 11                          | 4.4                     | 44                          | 24.2                    | 49                          | 28.6                    | 277                         |
| <b>Length of stay, n days</b>   |                             |                             |                         |                             |                         |                             |                         |                             |
| 0                               | NA                          | NA                          | NA                      | NA                          | 3.0                     | 6                           | 2.1                     | 21                          |
| 1                               | NA                          | NA                          | NA                      | NA                          | 14.0                    | 29                          | 11.9                    | 115                         |
| 2                               | NA                          | NA                          | NA                      | NA                          | 19.9                    | 40                          | 18.3                    | 177                         |
| 3                               | NA                          | NA                          | NA                      | NA                          | 19.0                    | 39                          | 16.7                    | 162                         |
| 4+                              | NA                          | NA                          | NA                      | NA                          | 44.2                    | 90                          | 51.0                    | 494                         |
| <b>Disposition</b>              |                             |                             |                         |                             |                         |                             |                         |                             |
| Routine                         | 88.3                        | 590                         | 85.4                    | 858                         | 71.4                    | 145                         | 67.8                    | 656                         |
| Transfer to short-term hospital | 1.4                         | 10                          | 3.1                     | 31                          | 1.9                     | 4                           | 2.1                     | 21                          |
| Other transfers                 | 5.1                         | 34                          | 6.5                     | 65                          | 11.6                    | 24                          | 13.8                    | 134                         |
| Home health care                | .2                          | 1                           | .4                      | 4                           | 4.2                     | 9                           | 8.8                     | 85                          |

|                                         |      |     |      |     |      |     |      |     |
|-----------------------------------------|------|-----|------|-----|------|-----|------|-----|
| Against medical advice                  | 4.4  | 30  | 4.0  | 40  | 9.5  | 19  | 5.7  | 55  |
| Died                                    | .0   | 0   | .1   | 1   | 1.4  | 3   | 1.8  | 17  |
| Not admitted, destination unknown       | .5   | 3   | .5   | 5   | 0    | 0   | 0    | 0   |
| Discharged alive, destination unknown   | .0   | 0   | NR   | NR  | NR   | NR  | .0   | 0   |
| Primary payer                           |      |     |      |     |      |     |      |     |
| Public (Medicare/Medicaid)              | 49.7 | 332 | 51.4 | 516 | 61.8 | 125 | 66.4 | 643 |
| Private                                 | 20.0 | 134 | 20.0 | 201 | 22.3 | 45  | 20.1 | 195 |
| Self-pay                                | 25.6 | 171 | 24.0 | 241 | 11.3 | 23  | 9.2  | 89  |
| No charge/Other                         | 4.7  | 31  | 4.6  | 47  | 4.6  | 9   | 4.2  | 41  |
| Location/teaching status of hospital    |      |     |      |     |      |     |      |     |
| Rural                                   | 11.1 | 74  | 15.4 | 155 | 8.5  | 17  | 8.0  | 77  |
| Urban non-teaching                      | 21.6 | 144 | 22.5 | 226 | 22.8 | 46  | 22.4 | 217 |
| Urban teaching                          | 67.3 | 449 | 62.1 | 623 | 68.6 | 139 | 69.7 | 674 |
| Comorbidity conditions                  |      |     |      |     |      |     |      |     |
| Congestive heart failure                | .7   | 5   | 2.2  | 22  | 4.5  | 9   | 7.1  | 69  |
| Valvular disease                        | .2   | 1   | .6   | 6   | 1.4  | 3   | 2.3  | 23  |
| Pulmonary circulation disease           | .0   | 0   | .1   | 1   | .2   | 1   | .7   | 7   |
| Peripheral vascular disease             | .2   | 1   | .7   | 7   | 1.3  | 3   | 3.7  | 36  |
| Hypertension                            | 16.0 | 107 | 23.0 | 231 | 39.1 | 80  | 42.1 | 407 |
| Paralysis                               | .1   | 1   | .4   | 4   | .9   | 2   | 2.3  | 22  |
| Other neurological disorders            | 6.6  | 44  | 5.8  | 58  | 15.3 | 31  | 10.2 | 99  |
| Chronic pulmonary disease               | 6.0  | 40  | 10.1 | 102 | 16.6 | 34  | 21.8 | 211 |
| Diabetes w/o chronic complications      | 3.7  | 25  | 5.2  | 52  | 6.1  | 12  | 7.1  | 69  |
| Diabetes w/ chronic complications       | .9   | 6   | 2.2  | 22  | 5.3  | 11  | 9.5  | 92  |
| Hypothyroidism                          | 1.0  | 7   | 1.9  | 19  | 5.0  | 10  | 6.8  | 66  |
| Renal failure                           | .5   | 3   | 1.6  | 17  | 4.3  | 9   | 8.2  | 79  |
| Liver disease                           | 1.7  | 11  | 3.9  | 39  | 10.7 | 22  | 13.5 | 131 |
| Peptic ulcer disease with bleeding      | .1   | 0   | .2   | 2   | 1.0  | 2   | 1.1  | 10  |
| Acquired immune deficiency syndrome     | .3   | 2   | .5   | 5   | .5   | 1   | .7   | 7   |
| Lymphoma                                | .0   | 0   | .1   | 1   | .1   | 0   | .4   | 4   |
| Metastatic cancer                       | .0   | 0   | .2   | 2   | .4   | 1   | 1.5  | 15  |
| Solid tumor w/out metastasis            | .1   | 1   | .3   | 4   | 1.0  | 2   | 1.5  | 14  |
| Rheumatoid arthritis/collagen vas. dis. | .3   | 2   | .7   | 7   | 1.2  | 2   | 2.0  | 20  |
| Coagulopathy                            | .5   | 4   | .9   | 9   | 14.6 | 30  | 10.0 | 97  |
| Obesity                                 | .7   | 5   | 2.2  | 22  | 6.9  | 14  | 11.3 | 109 |
| Weight loss                             | .1   | 1   | .4   | 5   | 5.8  | 12  | 7.3  | 71  |
| Fluid and electrolyte disorders         | 4.6  | 31  | 7.2  | 72  | 36.5 | 74  | 34.3 | 332 |
| Chronic blood loss anemia               | .0   | 0   | .1   | 1   | 1.1  | 2   | 1.6  | 16  |
| Deficiency anemias                      | 1.0  | 6   | 2.4  | 24  | 14.0 | 28  | 16.9 | 164 |
| Psychoses                               | 5.7  | 38  | 8.3  | 83  | 13.8 | 28  | 9.2  | 89  |
| Depression                              | 8.7  | 58  | 10.3 | 104 | 27.5 | 56  | 18.5 | 179 |

Data source: Healthcare Cost and Utilization Project Nationwide Emergency Department Sample and National Inpatient Sample, 2017.

Abbreviations: AI/AN = American Indian / Alaska Native, NA = not applicable, NR = not reported (the relative standard error was over 30 percent or the standard error = 0; the value of the estimate was considered unreliable), PI = Pacific Islander, SUD = substance use disorder.

Notes: Encounters with a principal SUD diagnosis are not mutually exclusive from those with a secondary SUD diagnosis. SUD diagnosis rates by age, sex, and race are based on population size for those categories. SUD rates by comorbidities, length of stay, primary payer, and status of hospital are based on total population. Population data are from the 6/28/2019 update from the National Center for Health Statistics.
